# Supplementary material
Source: MDPI journal article supplement (https://www.mdpi.com/2079-4991/12/14/2415)
Supplement: s1 [file s1]

Archive with 1 entries (1 files):
- Nanomaterials-Supplementary New.pdf
